# Supplementary material for: Unraveling the Stratification of an Iron-Oxidizing Microbial Mat by Metatranscriptomics
Source: PubMed Central journal article supplement (PMC4102501; doi:10.1371/journal.pone.0102561), 2014-07-17
Supplement: pone.0102561.s001.pdf [file pone.0102561.s001.pdf]

Supporting Information

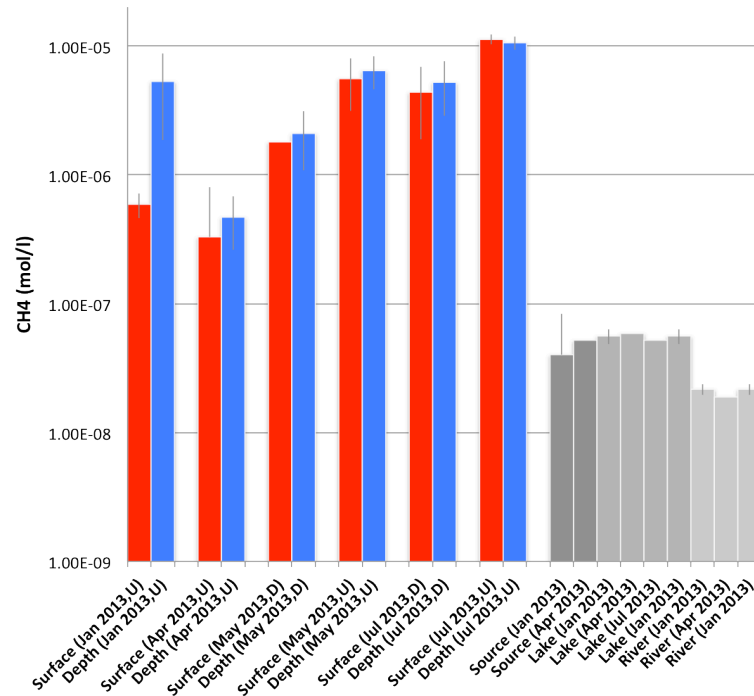

**Figure S1.** Methane concentrations measured at the sampling sites. Methane concentrations were measured at the two sampling sites (U, upstream; D, downstream) in triplicates distinguishing between depth and surface. For two samples (Surface Jan 2013,D; Surface May 2013,D) only a single measurement was available. Higher methane concentrations were measured in corresponding deep samples with one exception in the samples July 2013, U. Surrounding waters without microbial mat observation are shown in grey: Source, water flow directly upstream of the microbial mats; Lake, lake above the stream without microbial mat; River, main stream with stronger water current.

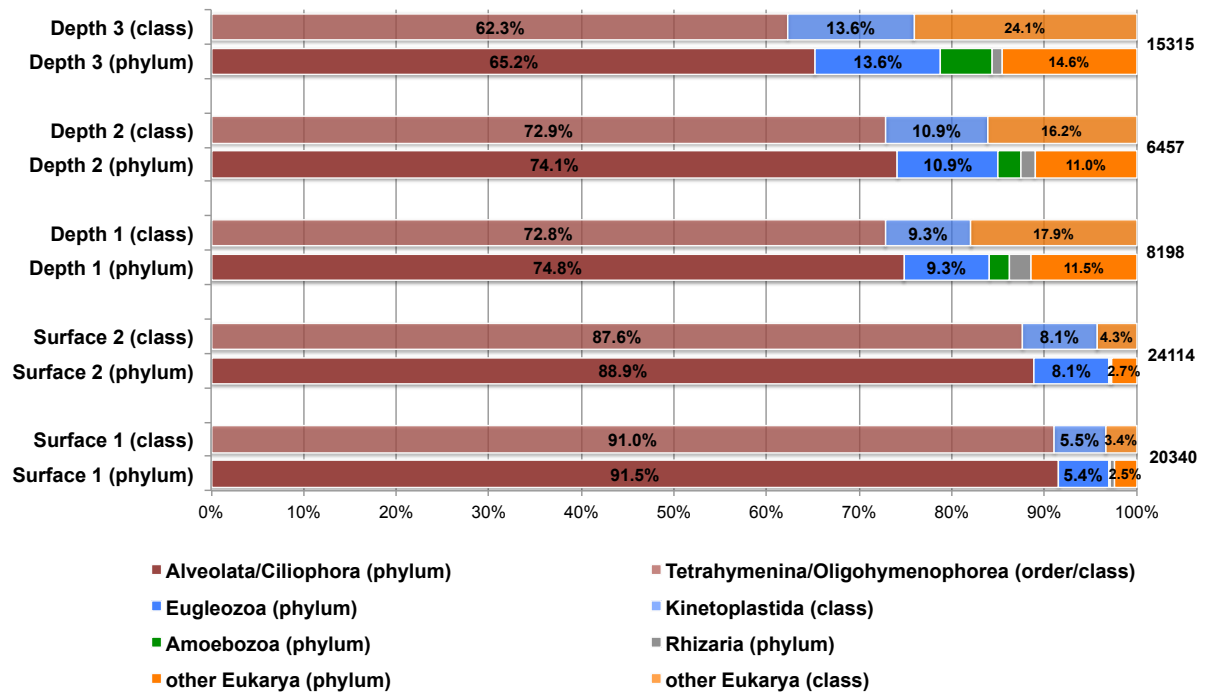

**Figure S2.** Relative abundance of the eukaryotic members of the microbial community based on the taxonomic affiliation of SSU rRNA read matches at the phylum and class levels. The rRNA reads from each triplicate were combined and normalized average values are shown. The total numbers of eukaryotic matches included in the analysis are indicated. The large majority of eukaryotic matches are affiliated to Tetrahymenina/Oligohymenophorea that contains essentially freshwater grazers such as *Tetrahymena* species (ranging from 62.3% to 91.0% of the eukaryotic matches).

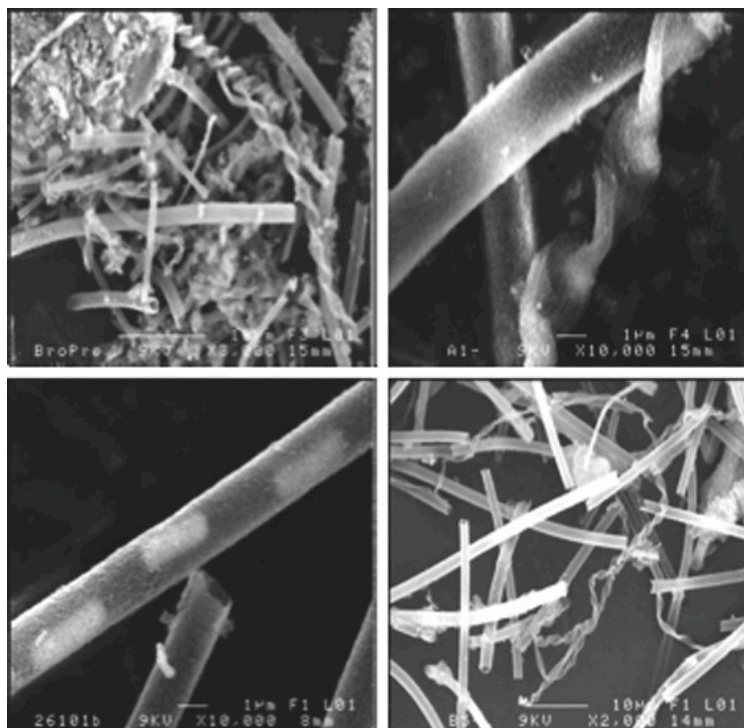

**Figure S3.** Scanning electron microscopy of the microbial mat showing typical extracellular sheets (*Leptothrix*) and stalks (*Gallionella*).

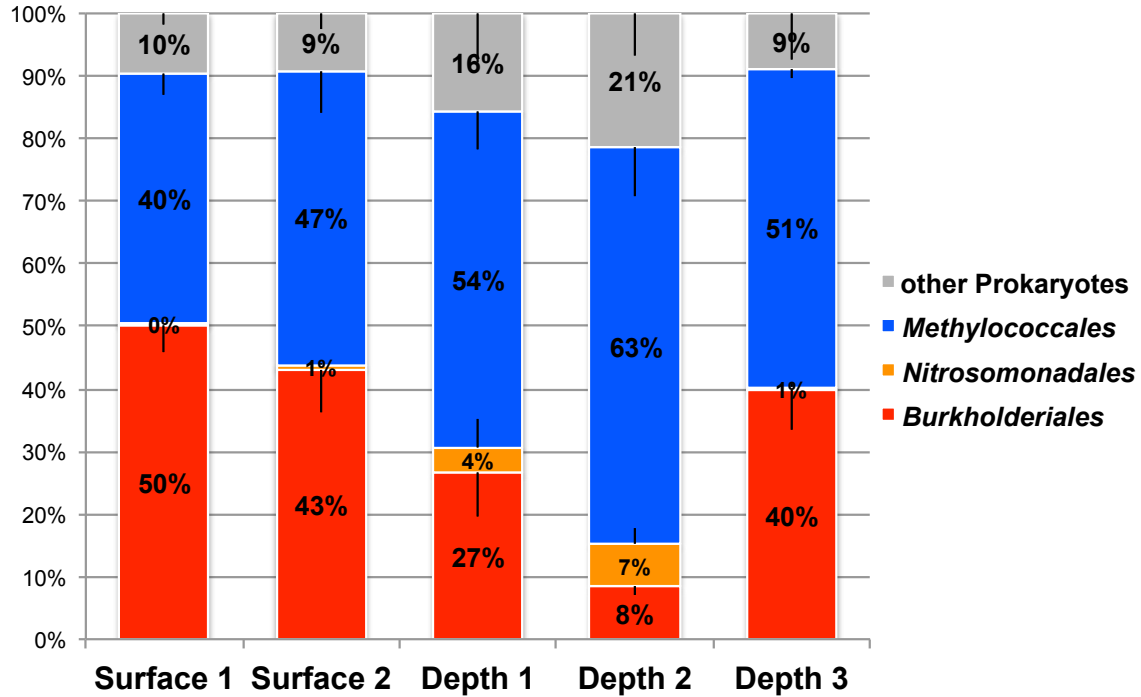

**Figure S4.** Relative abundance and taxonomic affiliations of OTUs. For illustration purposes confidence intervals from the triplicates are indicated either as negative or positive bars.

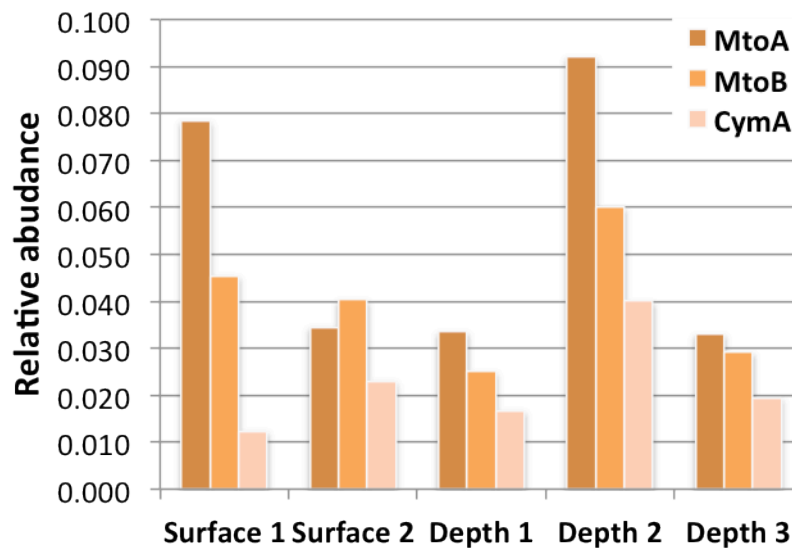

**Figure S5.** Relative abundance of reads matching transcripts encoding the three proteins involved in iron oxidation from *Sideroxidans lithotrophicus* ES-1. *MtrA*, *mtrB*, *cymA* transcripts from each triplicate were combined and normalized average values are shown (in total 158 matches).

**Table S1.** General characteristics of the microbial mat samples.

|                                | Surface 1 (S1)               | Surface 2 (S2)               | Depth 1 (D1)                               | Depth 2 (D2)                               | Depth 3 (D3)                        |
|--------------------------------|------------------------------|------------------------------|--------------------------------------------|--------------------------------------------|-------------------------------------|
| Sampling date                  | 08.07.2010                   | 08.07.2010                   | 08.07.2010                                 | 08.07.2010                                 | 08.07.2010                          |
| Aspect                         | Clear orange, Flocculent     | Clear orange, Flocculent     | Brownish-red, Flocculent with precipitates | Brownish-red, Flocculent with precipitates | Dark brown Slimy dense precipitates |
| Collection depth               | Surface (1-3 cm)<br>Above D1 | Surface (1-3 cm)<br>Above D2 | Depth (6-8 cm)<br>Below S1                 | Depth (6-8 cm)<br>Below S2                 | Depth (on sed.*)                    |
| T (°C)                         | 16.6 °C                      | 15.0 °C                      | 15.7 °C                                    | 15.4 °C                                    | 15.3 °C                             |
| pH                             | 6.85                         | 6.94                         | 6.84                                       | 6.7                                        | 6.7                                 |
| Dissolved oxygen (mg/l)        | 1.8                          | 1.45                         | 2.25                                       | 1.31                                       | 1.51                                |
| Redoxpotential (mV)            | 317                          | 306                          | 277                                        | 178                                        | 197                                 |
| IC (mg/l)                      | 2.17                         | 1.96                         | 1.98                                       | 1.96                                       | 1.91                                |
| DOC (mg/l)                     | 10.38                        | 10.51                        | 11.77                                      | 8.76                                       | 10.81                               |
| Fe <sup>2+</sup> (ppm or mg/l) | 1.6                          | 5.21                         | 2.31                                       | 9.28                                       | 12.64                               |
| Fe <sup>3+</sup> (ppm or mg/l) | 0.11                         | 0.12                         | 0.14                                       | 0.32                                       | 0.1                                 |
| Comment                        | triplicate                   | triplicate                   | triplicate                                 | triplicate                                 | Duplicate                           |

\* On sed.: thin mat in contact with surface and sediment

**Table S2.** Diversity and richness estimates for the rRNA region analysis.

|                             | Surface 1 (S1) | Surface 2 (S2) | Depth 1 (D1) | Depth 2 (D2) | Depth 3 (D3) |
|-----------------------------|----------------|----------------|--------------|--------------|--------------|
| <b>Richness estimation</b>  |                |                |              |              |              |
| N° of OTUs                  | 383            | 244            | 675          | 756          | 2208         |
| Ace                         | 1211           | 722            | 2443         | 2646         | 4941         |
| Chao                        | 798.34         | 543.09         | 1677.50      | 1569.40      | 3894.25      |
| <b>Diversity estimation</b> |                |                |              |              |              |
| Shannon                     | 2.87           | 2.95           | 4.10         | 4.81         | 4.83         |
| Reciprocal Simpson          | 5.34           | 5.99           | 13.02        | 28.07        | 23.79        |
| N° of reads included        | 6,392          | 3,254          | 7,089        | 5,749        | 34,116       |

Table S3. Detailed match counts of non rRNA transcripts to microbial genome sequences

| Genomes used for best match identification          | Taxonomic affiliation of species         | summarized affiliation<br>(if adequate) |      |      |      |      |      |      |      |      |      |      |      |      |      | sum of matches /genome |      |
|-----------------------------------------------------|------------------------------------------|-----------------------------------------|------|------|------|------|------|------|------|------|------|------|------|------|------|------------------------|------|
|                                                     |                                          |                                         | S1_1 | S1_2 | S1_3 | D1_1 | D1_2 | D1_3 | D2_1 | D2_2 | D2_3 | S2_1 | S2_2 | S2_3 | D3_1 |                        | D3_2 |
| Methylovulum miyakonense mmoXplus (306921970)       | Gamma proteobacteria, Methylococcales    | other Bacteria                          | 0    | 0    | 0    | 0    | 0    | 1    | 0    | 0    | 1    | 0    | 0    | 0    | 0    | 0                      | 2    |
| Methylovulum miyakonense orf5plus (306921963)       | Gamma proteobacteria, Methylococcales    | other Bacteria                          | 2    | 11   | 3    | 9    | 49   | 3    | 22   | 18   | 1    | 5    | 3    | 1    | 59   | 26                     |      |
| Azoarcus (119896292)                                | Beta proteobacteria, Rhodocyclaceae      | other Bacteria                          | 5    | 4    | 8    | 1    | 1    | 14   | 0    | 7    | 18   | 5    | 1    | 4    | 13   | 0                      |      |
| Candidatus Nitrospira defluvii (302035394)          | Nitrospiraeae                            | other Bacteria                          | 0    | 2    | 5    | 1    | 1    | 3    | 1    | 7    | 48   | 1    | 1    | 1    | 11   | 1                      |      |
| Candidatus Koribacter versatilis (94967031)         | Acidobacteria                            | other Bacteria                          | 0    | 1    | 5    | 3    | 0    | 10   | 1    | 6    | 47   | 4    | 3    | 0    | 18   | 3                      |      |
| Anaeromyxobacter (153002879)                        | Delta proteobacteria, Myxococcales       | other Bacteria                          | 1    | 2    | 11   | 0    | 2    | 12   | 3    | 9    | 42   | 2    | 4    | 6    | 20   | 5                      |      |
| Aromatoleum aromaticum (56475432)                   | Beta proteobacteria, Rhodocyclaceae      | other Bacteria                          | 0    | 6    | 12   | 3    | 2    | 14   | 1    | 11   | 38   | 2    | 2    | 5    | 20   | 4                      |      |
| Gemmatimonas aurantiaca (226225406)                 | Gemmatimonadetes                         | other Bacteria                          | 4    | 2    | 21   | 4    | 2    | 19   | 1    | 8    | 41   | 1    | 1    | 2    | 21   | 1                      |      |
| Sorangium cellulosum (162448269)                    | Delta proteobacteria, Myxococcales       | other Bacteria                          | 3    | 8    | 13   | 4    | 3    | 9    | 0    | 7    | 57   | 8    | 2    | 2    | 19   | 5                      |      |
| Thiobacillus denitrificans (74316018)               | Beta proteobacteria, Hydrogenophilales   | other Bacteria                          | 2    | 7    | 16   | 1    | 4    | 22   | 0    | 9    | 46   | 1    | 5    | 9    | 14   | 4                      |      |
| Chitinophaga pinensis (256419057)                   | Bacteroidetes, Sphingobacteria           | other Bacteria                          | 0    | 7    | 10   | 3    | 8    | 12   | 0    | 8    | 40   | 2    | 6    | 1    | 36   | 8                      |      |
| Thauera sp. MZ1T (237653092)                        | Beta proteobacteria, Rhodocyclaceae      | other Bacteria                          | 7    | 11   | 23   | 2    | 1    | 20   | 0    | 3    | 28   | 17   | 3    | 4    | 21   | 4                      |      |
| Dechloromonas aromatica (71905642)                  | Beta proteobacteria, Rhodocyclaceae      | other Bacteria                          | 2    | 10   | 28   | 5    | 2    | 25   | 6    | 23   | 56   | 5    | 4    | 3    | 11   | 8                      |      |
| Anaerolinea thermophila (320159410)                 | Chloroflexi                              | other Bacteria                          | 4    | 5    | 13   | 4    | 1    | 13   | 1    | 13   | 77   | 6    | 3    | 2    | 45   | 14                     |      |
| Bradyrhizobium japonicum (27375111)                 | Alphaproteobacteria, Rhizobiales         | other Bacteria                          | 3    | 2    | 4    | 3    | 8    | 21   | 3    | 24   | 95   | 3    | 3    | 6    | 37   | 8                      |      |
| Pelobacter propionicus (118578449)                  | Delta proteobacteria, Desulfuromonadales | other Bacteria                          | 0    | 8    | 35   | 3    | 0    | 23   | 0    | 4    | 57   | 5    | 3    | 9    | 64   | 10                     |      |
| Candidatus Accumulibacter phosphatis (257091663)    | Beta proteobacteria, unclassified        | other Bacteria                          | 5    | 10   | 36   | 8    | 5    | 32   | 2    | 15   | 48   | 13   | 11   | 11   | 39   | 6                      |      |
| Chthoniobacter flavus (WGS NZ_ABVLO1000000)         | Verrucomicrobia                          | other Bacteria                          | 1    | 9    | 20   | 5    | 9    | 23   | 0    | 18   | 81   | 5    | 7    | 3    | 59   | 15                     |      |
| Variovorax paradoxus (319790694)                    | Burkholderiales, Comamonadaceae          | other Comamonadaceae                    | 9    | 19   | 41   | 4    | 0    | 29   | 1    | 4    | 33   | 13   | 4    | 6    | 25   | 7                      |      |
| Polaromonas naphthalenivorans CJ2 plasmids          | Burkholderiales, Comamonadaceae          | other Comamonadaceae                    | 0    | 2    | 2    | 1    | 0    | 1    | 0    | 2    | 3    | 6    | 2    | 3    | 4    | 1                      |      |
| Polaromonas naphthalenivorans CJ2 chrom (121602919) | Burkholderiales, Comamonadaceae          | other Comamonadaceae                    | 4    | 12   | 35   | 9    | 1    | 33   | 0    | 10   | 60   | 16   | 7    | 7    | 26   | 5                      |      |
| Polaromonas sp. JS666 (91785913)                    | Burkholderiales, Comamonadaceae          | other Comamonadaceae                    | 8    | 13   | 58   | 4    | 2    | 42   | 0    | 13   | 61   | 9    | 11   | 14   | 33   | 6                      |      |
| Curvibacter putative symbiont (260219428)           | Burkholderiales, Comamonadaceae          | other Comamonadaceae                    | 9    | 26   | 70   | 7    | 4    | 47   | 3    | 24   | 99   | 27   | 15   | 17   | 38   | 8                      |      |
| Acidovorax delafieldii (WGS NZ_ACQT01000000)        | Burkholderiales, Comamonadaceae          | other Comamonadaceae                    | 10   | 19   | 65   | 17   | 4    | 48   | 1    | 8    | 63   | 15   | 10   | 16   | 23   | 7                      |      |
| Methylobacillus flagellatus (91774356)              | Beta proteobacteria; Methylophilales     | other Methylophilales                   | 0    | 3    | 18   | 5    | 2    | 24   | 0    | 10   | 30   | 6    | 4    | 4    | 12   | 6                      |      |
| Methylovorus sp. MP688 (313199777)                  | Beta proteobacteria; Methylophilales     | other Methylophilales                   | 3    | 5    | 10   | 7    | 2    | 21   | 1    | 15   | 50   | 8    | 2    | 1    | 12   | 6                      |      |
| Methylotenera mobilis (253995374)                   | Beta proteobacteria; Methylophilales     | other Methylophilales                   | 1    | 9    | 21   | 7    | 3    | 39   | 3    | 10   | 49   | 6    | 4    | 14   | 21   | 10                     |      |
| Methylotenera versatilis (297537197)                | Beta proteobacteria; Methylophilales     | other Methylophilales                   | 10   | 17   | 89   | 13   | 8    | 110  | 2    | 31   | 170  | 8    | 21   | 10   | 50   | 17                     |      |
| Geobacter metallireducens (78221228)                | Delta proteobacteria, Desulfuromonadales | Geobacter species                       | 0    | 2    | 16   | 0    | 3    | 4    | 1    | 3    | 15   | 0    | 2    | 0    | 21   | 6                      |      |
| Geobacter lovleyi (189423082)                       | Delta proteobacteria, Desulfuromonadales | Geobacter species                       | 3    | 0    | 22   | 5    | 0    | 14   | 1    | 9    | 27   | 1    | 1    | 1    | 43   | 8                      |      |
| Geobacter uraniireducens (148262085)                | Delta proteobacteria, Desulfuromonadales | Geobacter species                       | 1    | 3    | 17   | 3    | 2    | 20   | 1    | 7    | 36   | 3    | 4    | 2    | 46   | 13                     |      |

N° of matches from species summarized in histogram (Fig. 3a)

| Genomes used for best match identification     | Taxonomic affiliation of species      | S1_1 | S1_2 | S1_3 | D1_1 | D1_2 | D1_3 | D2_1 | D2_2 | D2_3 | S2_1 | S2_2 | S2_3 | D3_1 | D3_2 | sum of matches /genome |
|------------------------------------------------|---------------------------------------|------|------|------|------|------|------|------|------|------|------|------|------|------|------|------------------------|
| other Bacteria                                 |                                       | 39   | 105  | 263  | 59   | 98   | 276  | 41   | 190  | 821  | 85   | 62   | 69   | 507  | 122  | 2737                   |
| other Comamonadaceae                           |                                       | 40   | 91   | 271  | 42   | 11   | 200  | 5    | 61   | 319  | 86   | 49   | 63   | 149  | 34   | 1421                   |
| other Methylophilales                          |                                       | 14   | 34   | 138  | 32   | 15   | 194  | 6    | 66   | 299  | 28   | 31   | 29   | 95   | 39   | 1020                   |
| Solibacter usitatus (116222307)                | Acidobacteria                         | 3    | 4    | 28   | 6    | 2    | 35   | 2    | 27   | 147  | 4    | 3    | 0    | 64   | 15   | 340                    |
| Opitutus terrae (182411826)                    | Verrucomicrobia                       | 10   | 3    | 45   | 1    | 3    | 54   | 0    | 21   | 129  | 10   | 2    | 6    | 88   | 7    | 379                    |
| Pedospaera parvula Ellin514 (WGS_ABOX00000000) | Verrucomicrobia                       | 3    | 5    | 25   | 5    | 2    | 70   | 2    | 29   | 258  | 14   | 9    | 2    | 189  | 19   | 632                    |
| Methylubium petroleiphilum (124265193)         | Burkholderiales incertae sedis        | 50   | 88   | 303  | 29   | 10   | 152  | 3    | 10   | 120  | 84   | 35   | 76   | 53   | 17   | 1030                   |
| Geobacter species                              |                                       | 4    | 5    | 55   | 8    | 5    | 38   | 3    | 19   | 78   | 4    | 7    | 3    | 110  | 27   | 366                    |
| Rhodiferax ferrireducens T118 (89343559)       | Burkholderiales, Comamonadaceae       | 12   | 32   | 124  | 17   | 7    | 105  | 3    | 41   | 286  | 38   | 20   | 23   | 163  | 20   | 891                    |
| Gallionella capsiferriformans (302580034)      | Gallionellaceae                       | 4    | 8    | 34   | 20   | 19   | 87   | 16   | 84   | 383  | 13   | 12   | 12   | 110  | 18   | 820                    |
| Sideroxydans lithotrophicus (291582584)        | Gallionellaceae                       | 6    | 11   | 46   | 30   | 28   | 215  | 17   | 106  | 718  | 40   | 25   | 19   | 334  | 96   | 1691                   |
| Leptothrix choldonii (170774137)               | Burkholderiales incertae sedis        | 218  | 401  | 1376 | 90   | 25   | 639  | 15   | 41   | 210  | 280  | 200  | 312  | 147  | 51   | 4005                   |
| Methylococcus capsulatus (66270661)            | Gamma proteobacteria, Methylococcales | 5    | 12   | 33   | 9    | 15   | 64   | 8    | 31   | 125  | 13   | 16   | 17   | 85   | 26   | 459                    |
| Crenothrix polyspora                           | Gamma proteobacteria, Methylococcales | 46   | 122  | 260  | 137  | 108  | 290  | 67   | 96   | 423  | 62   | 94   | 63   | 390  | 177  | 2335                   |
| Methylobacter tundripaludum (344939781)        | Gamma proteobacteria, Methylococcales | 93   | 226  | 479  | 188  | 207  | 564  | 138  | 247  | 810  | 71   | 131  | 107  | 887  | 397  | 4545                   |
|                                                | sum of matches/replicate              | 547  | 1147 | 3480 | 673  | 555  | 2983 | 326  | 1069 | 5126 | 832  | 696  | 801  | 3371 | 1065 | 22671                  |

N° of matches from species represented in histogram (Fig. 3a)
